# Supplementary material for: CRISPR-mediated activation of endogenous BST-2/tetherin expression inhibits wild-type HIV-1 production
Source: PubMed Central journal article supplement (PMC6395588; doi:10.1038/s41598-019-40003-z), 2019-02-28
Supplement: 41598_2019_40003_MOESM1_ESM.pdf [file 41598_2019_40003_MOESM1_ESM.pdf]

## **Supplementary information**

### **CRISPR-mediated activation of endogenous BST-2/tetherin expression inhibits wild-type HIV-1 production**

Yanzhao Zhang, Seiya Ozono, Weitong Yao, Minoru Tobiume, Shoji Yamaoka,  
Satoshi Kishigami, Hideaki Fujita, and Kenzo Tokunaga

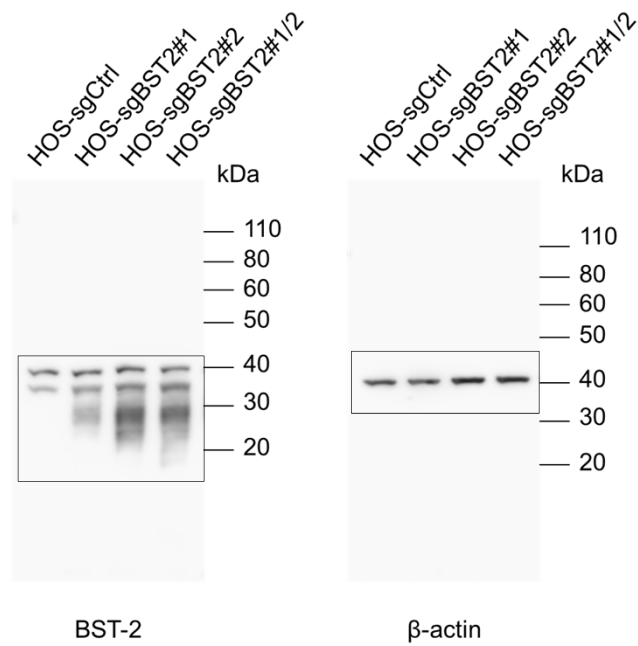

### Supplementary Figure 1.

Original uncropped images of Western Blot in Figure 2A. The PVDF membrane was incubated with an anti-BST-2 antibody, then stripped and reprobed with an anti- $\beta$ -actin antibody for a loading control. Images shown in Fig. 2A were cropped from the boxed areas, and the brightness/contrast was adjusted equally across the entire image using Photoshop CS6.
